# Supplementary material
Source: Springer Nature journal article supplement (https://www.springermedizin.de/resource/supplementary/12958_2006_334_MOESM3_ESM.pdf/9567652)

**A**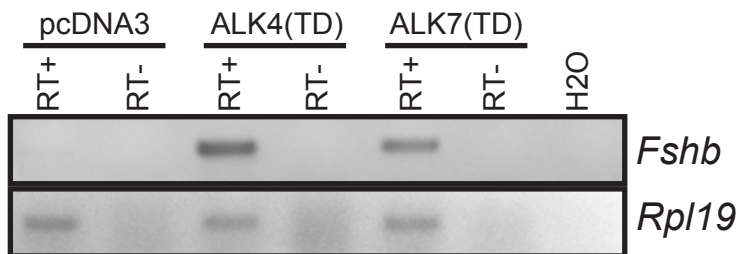**B**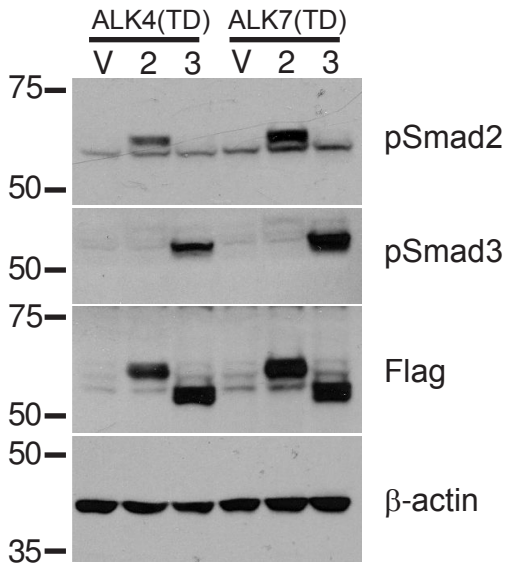

Supplement: MOESM3 [file 9567652]
